# Supplementary material
Source: ML conference proceedings conference paper supplement (https://www.ecva.net/papers/eccv_2022/papers_ECCV/html/136890052_ECCV_2022_paper.php)
Supplement: Supplementary file 3 [file 136890052-supp.zip]

Archive with 5 entries (5 files):
- 1525-supp.pdf
- __MACOSX/._1525-supp.pdf
- ECCV2022.mp4
- __MACOSX/._ECCV2022.mp4
- README.txt
