# Supplementary material
Source: ML conference proceedings conference paper supplement (https://www.ecva.net/papers/eccv_2022/papers_ECCV/html/136890052_ECCV_2022_paper.php)
Supplement: Supplementary file 3 [file 136890052-supp.zip › README.txt]

The supplemental video is encoded using H.264.
